# Supplementary material for: Genome-Guided Discovery of Pretilactam from Actinosynnema pretiosum ATCC 31565
Source: PubMed Central journal article supplement (PMC6631532; doi:10.3390/molecules24122281), 2019-06-19
Supplement: molecules-24-02281-s001.pdf [file molecules-24-02281-s001.pdf]

**Supplementary material**

Genome-Guided discovery of pretilactam from *Actinosynnema pretiosum* ATCC 31565

*Jing Wang, Xiaowen Hu, Guizhi Sun, Linli Li, Bingya Jiang,\* Shufen Li, Liping Bai,*

*Hongyu Liu, Liyan Yu, Linzhuan Wu\**

NHC Key Laboratory of Biotechnology of Antibiotics, CAMS Key Laboratory of Synthetic

Biology for Drug Innovation, Institute of Medicinal Biotechnology, Chinese Academy of Medical

Sciences and Peking Union Medical College, Beijing 100050, People's Republic of China

\*To whom correspondence should be addressed. Tel: +86-10-63165283. Fax: +86-10-63017302.

E-mail: jiangbingya@163.com or wulinzhuan@imb.pumc.edu.cn.

## Contents

|                   |                                                                                                                         |    |
|-------------------|-------------------------------------------------------------------------------------------------------------------------|----|
| <b>Figure S1</b>  | AntiSMASH of the genomic DNA of ATCC 31565.....                                                                         | S3 |
| <b>Figure S2</b>  | HR(+)-ESIMS of pretilactam ( <b>1</b> ).....                                                                            | S4 |
| <b>Figure S3</b>  | <sup>1</sup> H NMR spectrum (800 MHz) of pretilactam ( <b>1</b> ) in DMSO- <i>d</i> <sub>6</sub> .....                  | S4 |
| <b>Figure S4</b>  | <sup>13</sup> C NMR spectrum (200 MHz) of pretilactam ( <b>1</b> ) in DMSO- <i>d</i> <sub>6</sub> .....                 | S5 |
| <b>Figure S5</b>  | <sup>1</sup> H- <sup>1</sup> H COSY spectrum (800 MHz) of pretilactam ( <b>1</b> ) in DMSO- <i>d</i> <sub>6</sub> ..... | S5 |
| <b>Figure S6</b>  | HSQC spectrum (200 MHz) of pretilactam ( <b>1</b> ) in DMSO- <i>d</i> <sub>6</sub> .....                                | S6 |
| <b>Figure S7</b>  | HMBC spectrum (200 MHz) of pretilactam ( <b>1</b> ) in DMSO- <i>d</i> <sub>6</sub> .....                                | S6 |
| <b>Figure S8</b>  | TOCSY spectrum (800 MHz) of pretilactam ( <b>1</b> ) in DMSO- <i>d</i> <sub>6</sub> .....                               | S7 |
| <b>Figure S9</b>  | NOESY spectrum (800 MHz) of pretilactam ( <b>1</b> ) in DMSO- <i>d</i> <sub>6</sub> .....                               | S7 |
| <b>Figure S10</b> | UV spectrum of pretilactam ( <b>1</b> ).....                                                                            | S8 |
| <b>Figure S11</b> | IR spectrum of pretilactam ( <b>1</b> ).....                                                                            | S8 |

| Identified secondary metabolite regions       |                            |         |         |                            |            |              |            |
|-----------------------------------------------|----------------------------|---------|---------|----------------------------|------------|--------------|------------|
| Region                                        | Type                       | From    | To      | Most similar known cluster | Similarity | MIBiG BGC-ID |            |
| The following regions are from record NODE_1: |                            |         |         |                            |            |              |            |
|                                               |                            |         |         |                            |            |              |            |
| Region 1                                      | Terpene                    | 46280   | 66796   | SF2575                     | polyketide | 6%           | BGC0000269 |
| Region 2                                      | Lanthipeptide              | 230028  | 253096  | Tetronasin                 | polyketide | 9%           | BGC0000163 |
| Region 3                                      | Terpene                    | 3209146 | 3229317 | Geosmin                    | other      | 100%         | BGC0001181 |
| Region 4                                      | Bacteriocin                | 3837575 | 3848375 |                            |            |              |            |
| Region 5                                      | Indole                     | 4468806 | 4489927 | Frankiamicin               | polyketide | 14%          | BGC0001197 |
| Region 6                                      | Nrpsfragment-Otherks-T1pks | 4936116 | 4980643 |                            |            |              |            |
| Region 7                                      | Nrps-T1pks                 | 5169664 | 5327702 | Salinilactam               | polyketide | 88%          | BGC0000142 |
| Region 8                                      | Nucleoside                 | 5384654 | 5405622 | Tunicamycin                | other      | 64%          | BGC0000880 |
| Region 9                                      | Nrps-T1pks                 | 5652921 | 5732628 | Tirandamycin               | hybrid     | 40%          | BGC0001052 |
| Region 10                                     | Otherks                    | 5814814 | 5854503 | Calcimycin                 | polyketide | 13%          | BGC0000032 |
| Region 11                                     | Nrpsfragment-T1pks         | 5878730 | 5975542 | Ansamitocin                | polyketide | 97%          | BGC0000020 |
| Region 12                                     | Lassoepptide               | 6034265 | 6056728 | SF2575                     | polyketide | 4%           | BGC0000269 |
| Region 13                                     | Nrps-Phosphonate-T1pks     | 6066797 | 6154441 | Himastatin                 | NRPS       | 8%           | BGC0001117 |
| Region 14                                     | Nrps-Otherks               | 6328654 | 6476784 | Naphthyridinomycin         | NRPS       | 60%          | BGC0000394 |
| Region 15                                     | Terpene                    | 6599385 | 6618894 | Isorenieratene             | terpene    | 85%          | BGC0000664 |
| Region 16                                     | Thiopeptide                | 6643965 | 6673418 |                            |            |              |            |
| Region 17                                     | T1pks                      | 6679293 | 6719988 | Coelimycin                 | polyketide | 8%           | BGC0000038 |
| Region 18                                     | T1pks                      | 6828788 | 6884394 |                            |            |              |            |
| Region 19                                     | T1pks                      | 6917680 | 6962500 | Kedarcidin                 | polyketide | 6%           | BGC0000081 |
| Region 20                                     | T1pks                      | 7248874 | 7310026 | Spinosad                   | polyketide | 8%           | BGC0000148 |
| Region 21                                     | Terpene                    | 7319928 | 7341610 | Brasilicardin A            | terpene    | 45%          | BGC0000632 |
| Region 22                                     | Nrps                       | 7369240 | 7462182 | Marformycins               | NRPS       | 12%          | BGC0001214 |
| Region 23                                     | Nrps                       | 7499669 | 7542655 |                            |            |              |            |
| Region 24                                     | Nrpsfragment-Other-T1pks   | 7542698 | 7611214 | Lasalocid                  | polyketide | 16%          | BGC0000087 |
| Region 25                                     | T1pks                      | 7645186 | 7703975 | Coelimycin                 | polyketide | 25%          | BGC0000038 |
| Region 26                                     | Oligosaccharide            | 7915377 | 7958960 |                            |            |              |            |
| Region 27                                     | Nrps                       | 8017917 | 8071251 | Erythrochelin              | NRPS       | 85%          | BGC0000349 |

**Figure S1** AntiSMASH of the genomic DNA of ATCC 31565

M-2 + #88 RT: 1.33 AV: 1 NL: 1.14E5  
T: FTMS + c ESI Full ms [300.00-700.00]

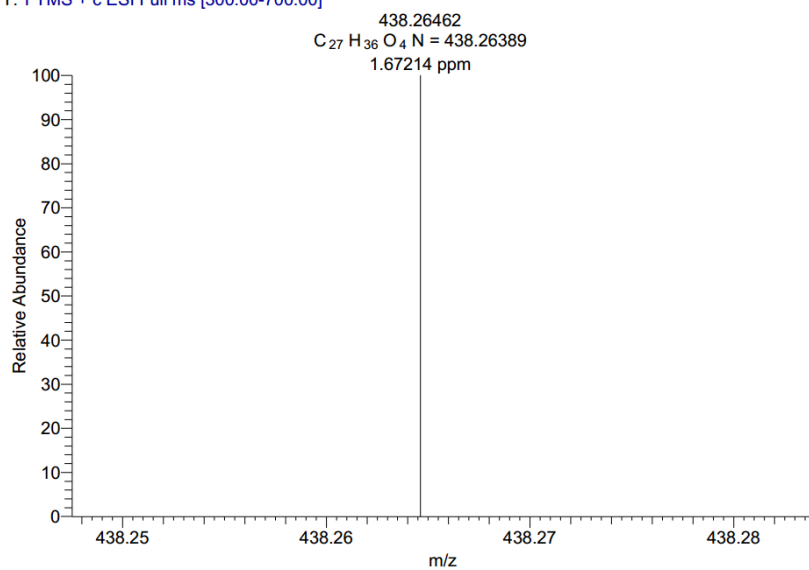

Figure S2 HR(+)-ESIMS of pretilactam (1)

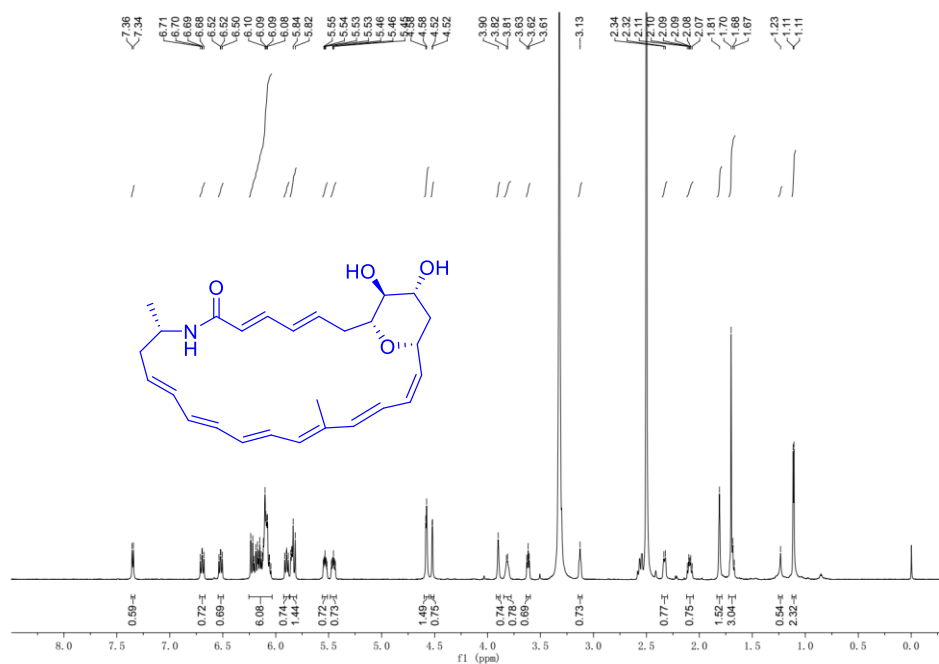

Figure S3 <sup>1</sup>H NMR spectrum (800 MHz) of pretilactam (1) in DMSO-*d*<sub>6</sub>

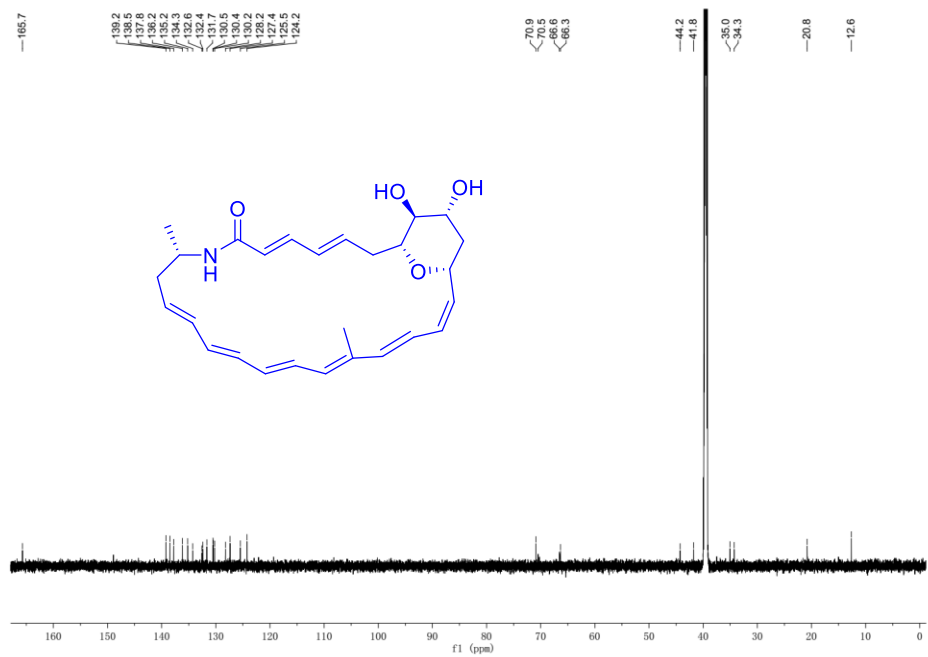

**Figure S4**  $^{13}\text{C}$  NMR spectrum (200 MHz) of pretilactam (**1**) in  $\text{DMSO-}d_6$

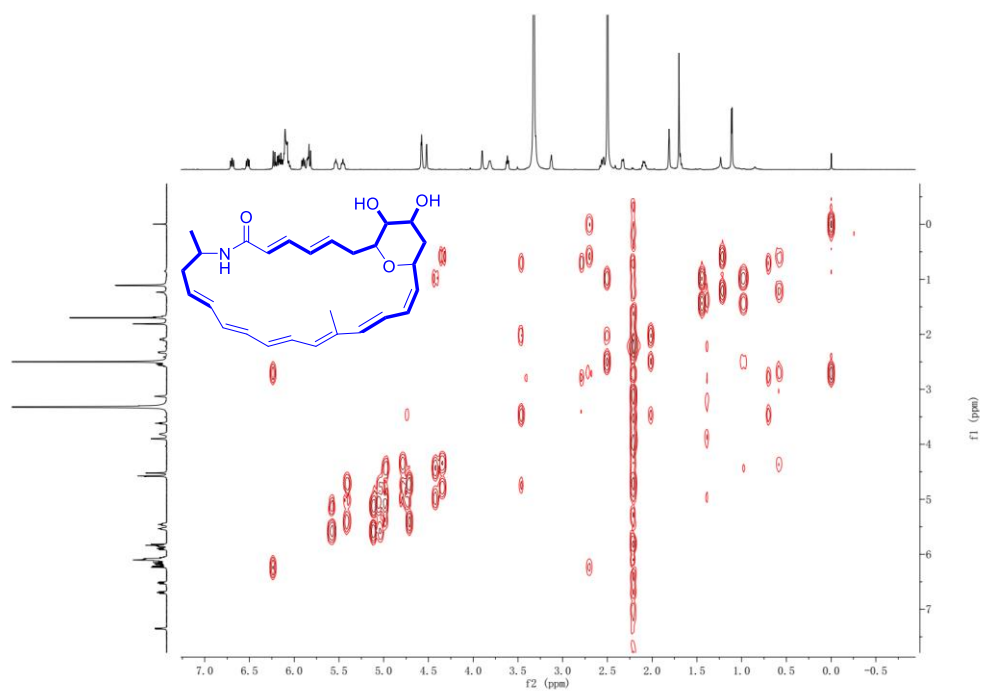

**Figure S5**  $^1\text{H-}^1\text{H}$  COSY spectrum (800 MHz) of pretilactam (**1**) in  $\text{DMSO-}d_6$

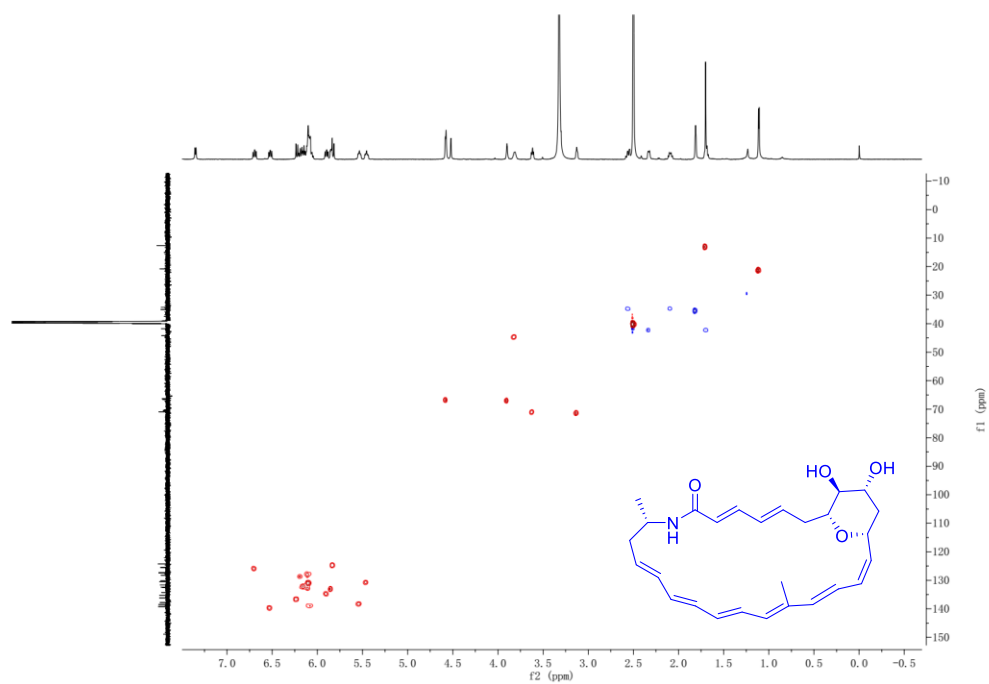

**Figure S6** HSQC spectrum (200 MHz) of pretilactam (**1**) in DMSO-*d*<sub>6</sub>

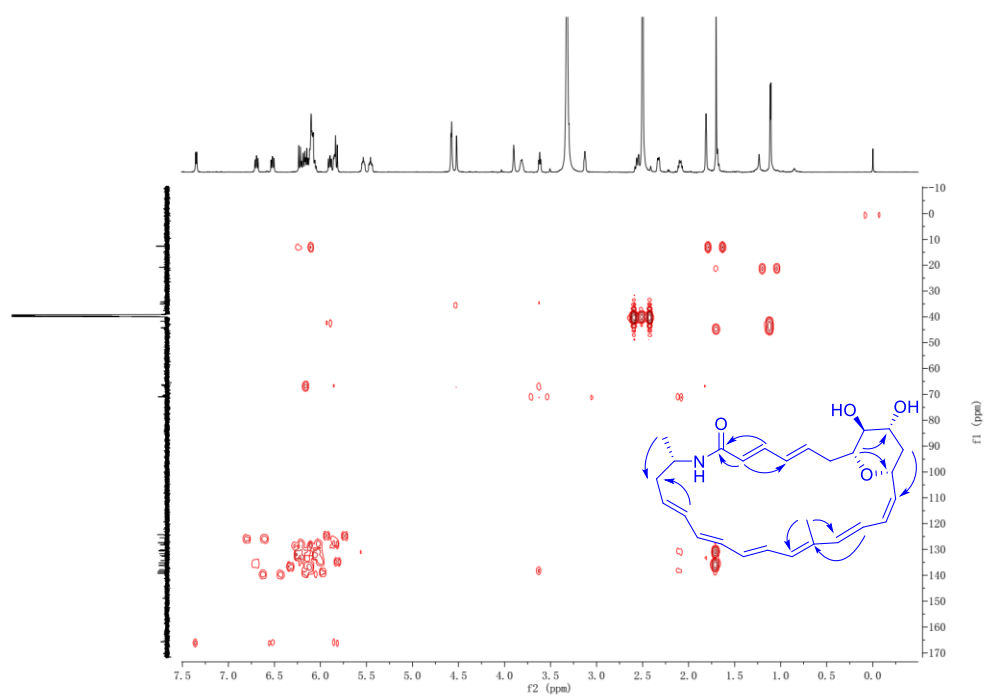

**Figure S7** HMBC spectrum (200 MHz) of pretilactam (**1**) in DMSO-*d*<sub>6</sub>

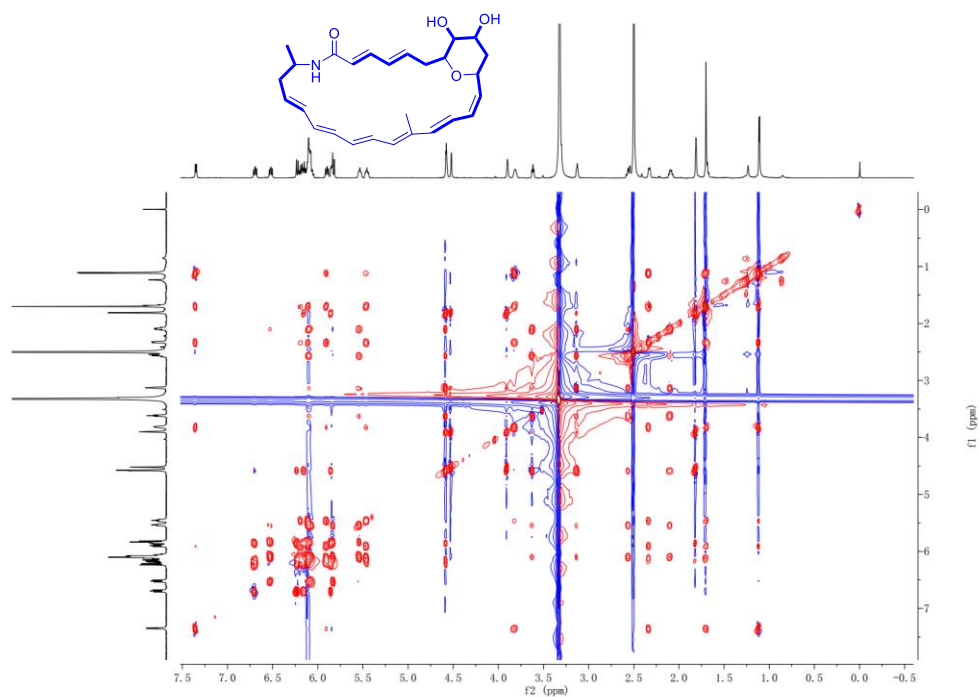

**Figure S8** TOCSY spectrum (800 MHz) of pretilactam (**1**) in DMSO- $d_6$

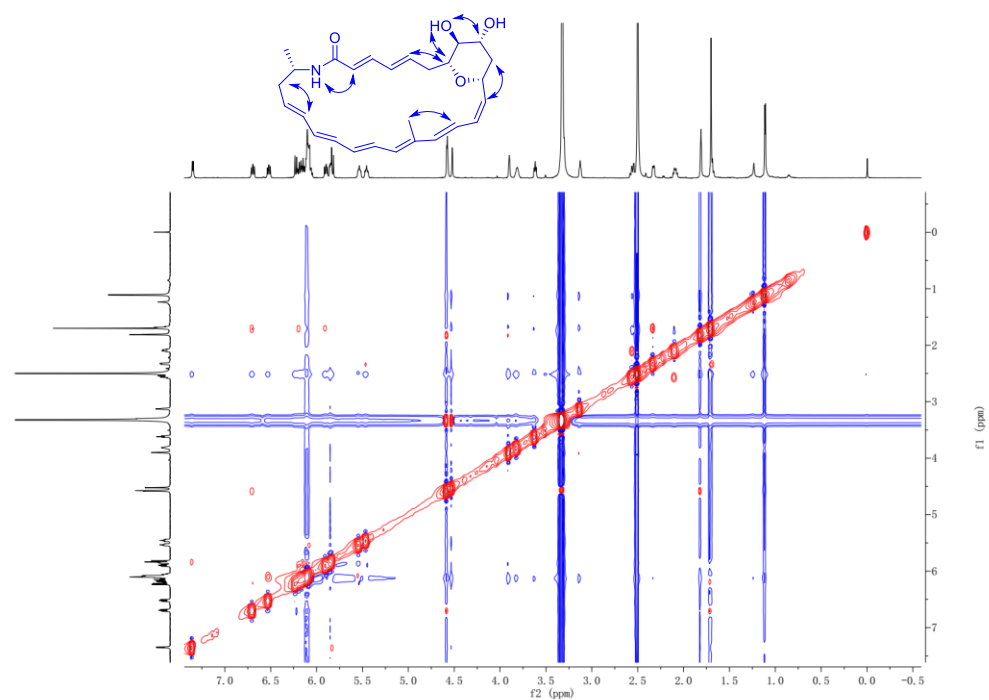

**Figure S9** NOESY spectrum (800 MHz) of pretilactam (**1**) in DMSO- $d_6$

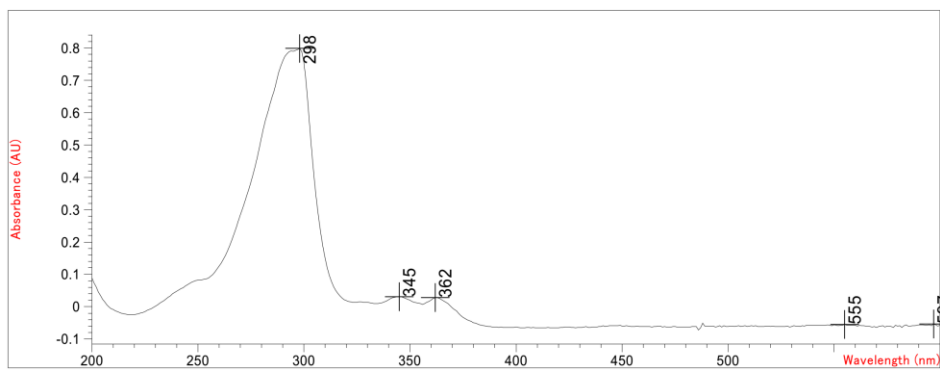

**Figure S10** UV spectrum of pretilactam (**1**)

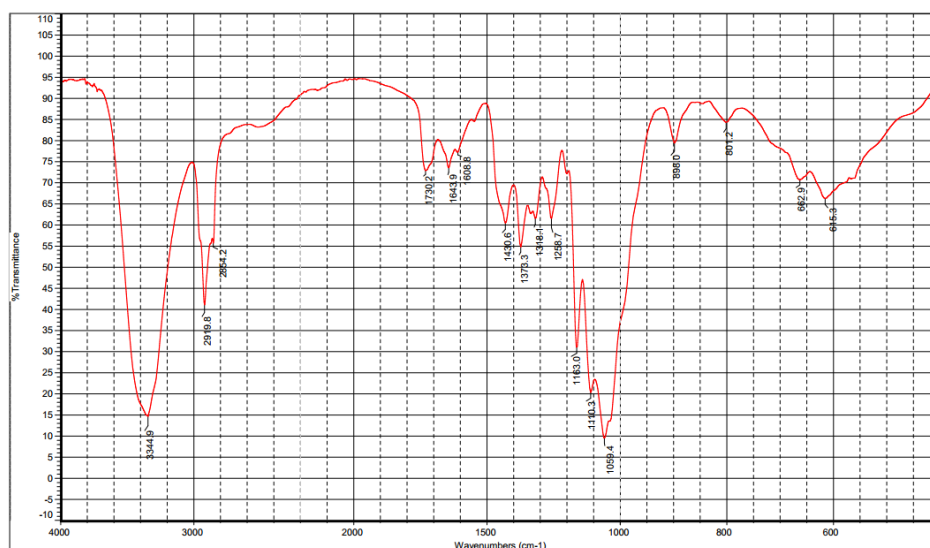

**Figure S11** IR spectrum of pretilactam (**1**)
